# Supplementary material for: ICOR: improving codon optimization with recurrent neural networks
Source: Springer Nature journal article supplement (doi:10.1186/s12859-023-05246-8), 2023-04-04
Supplement: 12859_2023_5246_MOESM7_ESM.pdf [file 12859_2023_5246_MOESM7_ESM.pdf]

| Hyperparameter Used in Model Training                                                            | Value of Parameter                |
|--------------------------------------------------------------------------------------------------|-----------------------------------|
| Gradient Decay Factor (dictates the decay rate of gradient moving average)                       | 0.95                              |
| Learning Rate (the extent to which weights are updated during training, also known as step size) | $5 \times 10^{-5}$                |
| L2 Regularization (factor of weight decay)                                                       | 1e-8                              |
| Shuffling (shuffles the order of training data)                                                  | never                             |
| Dropout (the factor by which neurons are temporarily ignored during training)                    | 0.2                               |
| Padding (ensures a ragged input—sequences are not padded to a uniform length)                    | off                               |
| Sorting (sort input by ascending sequence length)                                                | on                                |
| Optimizer (the solver algorithm used when training the network)                                  | adam (adaptive moment estimation) |
